# Supplementary material for: Longitudinal cerebrospinal fluid biomarker measurements in preclinical sporadic Alzheimer's disease: A prospective 9-year study
Source: PubMed Central journal article supplement (PMC4879483; doi:10.1016/j.dadm.2015.09.002), 2015-10-09

# Normal - MCI

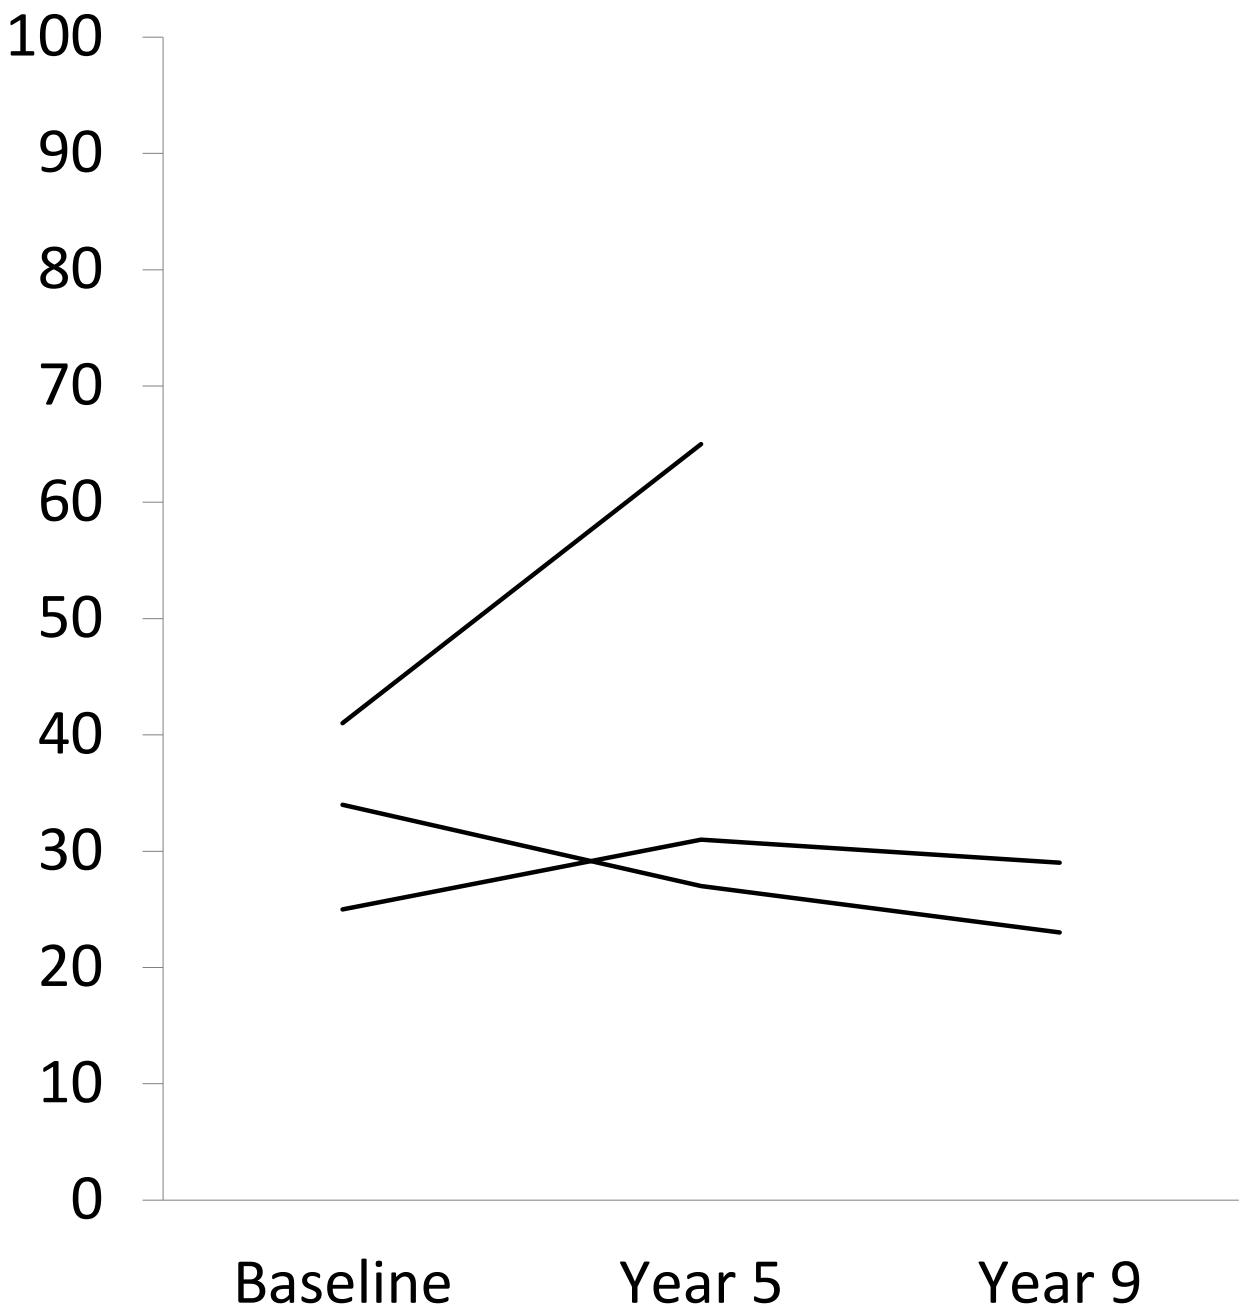

Supplement: mmc7.pdf [file mmc7.pdf]
